# Supplementary material for: Deciphering the signaling networks underlying simvastatin-induced apoptosis in human cancer cells: evidence for non-canonical activation of RhoA and Rac1 GTPases
Source: PubMed Central journal article supplement — Cell Death Dis. 2013 Apr 4;4(4):e568–. doi: 10.1038/cddis.2013.103 (PMC3641326; doi:10.1038/cddis.2013.103), 2013-04-04

## Supplemental Figure S1

**A**

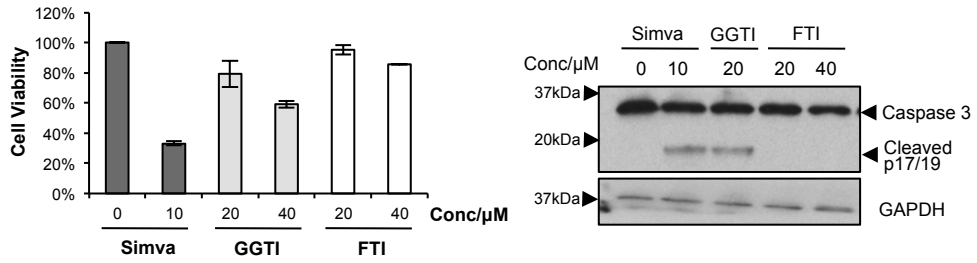

**B**

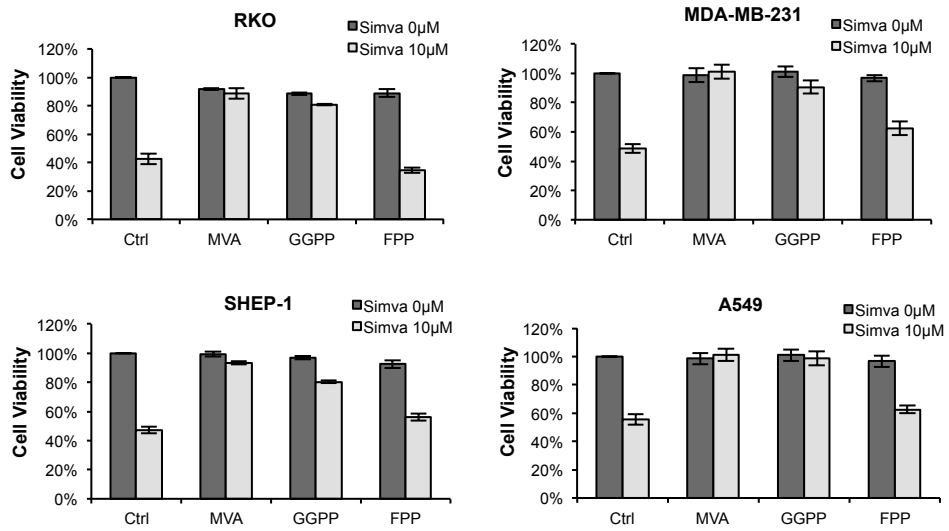

## Supplemental Figure S2

**A**

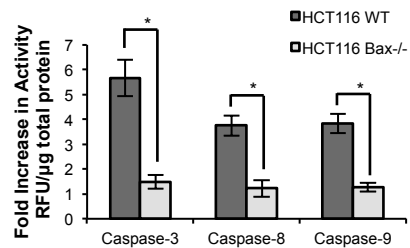

**B**

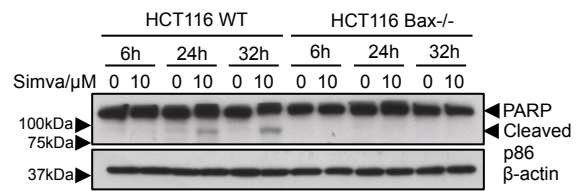

### Supplemental Figure S3

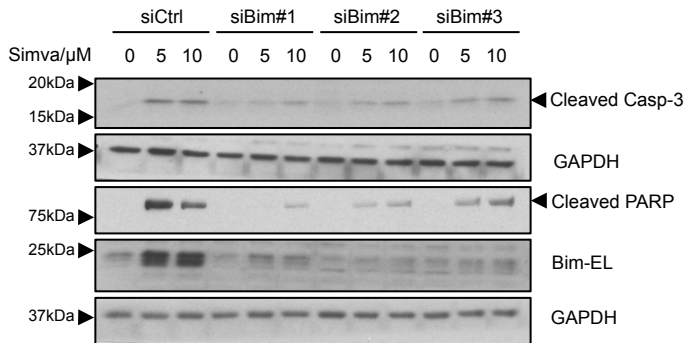

### Supplemental Figure S4

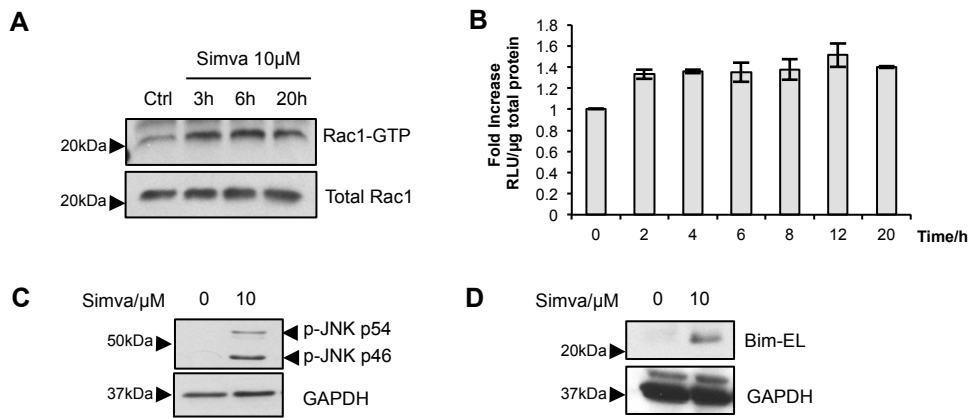

**Supplemental Figure S5**

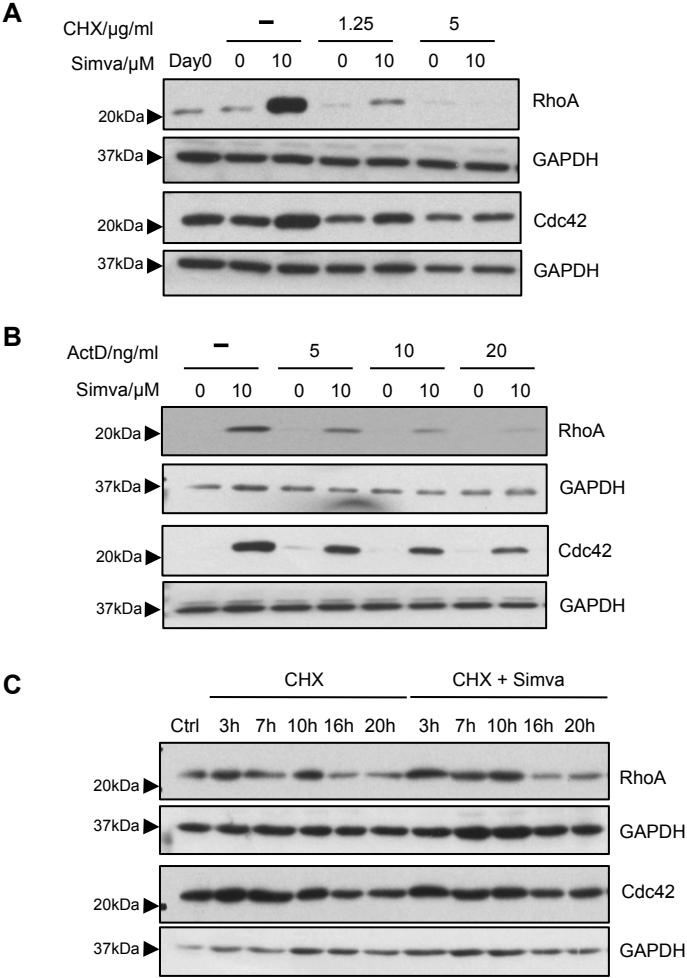

## Supplemental Figure S6

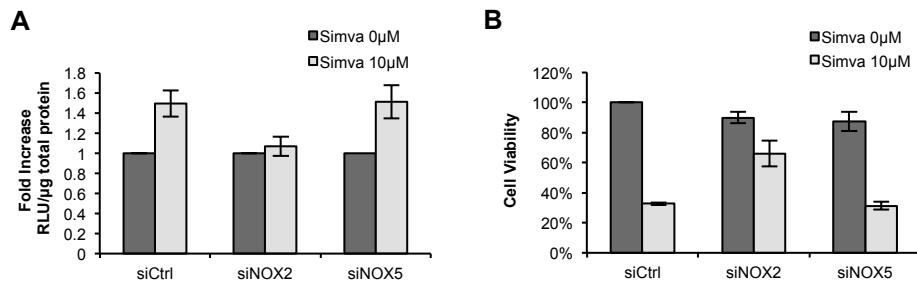

## Supplemental Figure S7

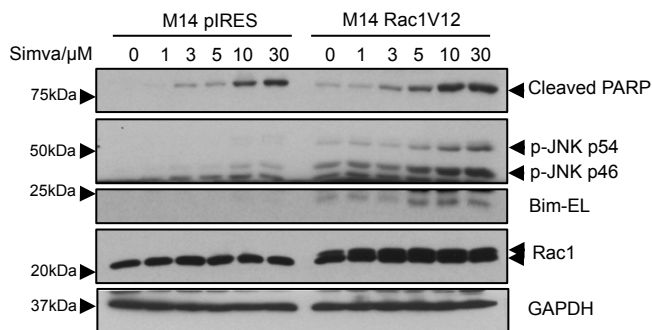

Supplement: cddis2013103x1.pdf [file cddis2013103x1.pdf]
